# Supplementary material for: A Rare Mutation in LMNB2 Associated with Lipodystrophy Drives Premature Cell Senescence
Source: MDPI journal article supplement (doi:10.3390/cells11010050), 2021-12-24
Supplement: s1 [file s1]

A.

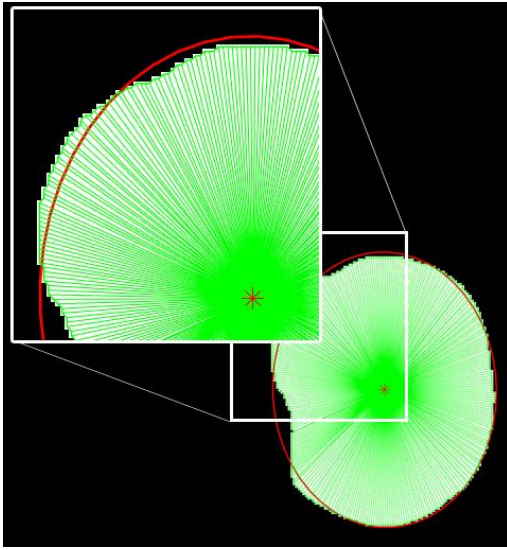

B.

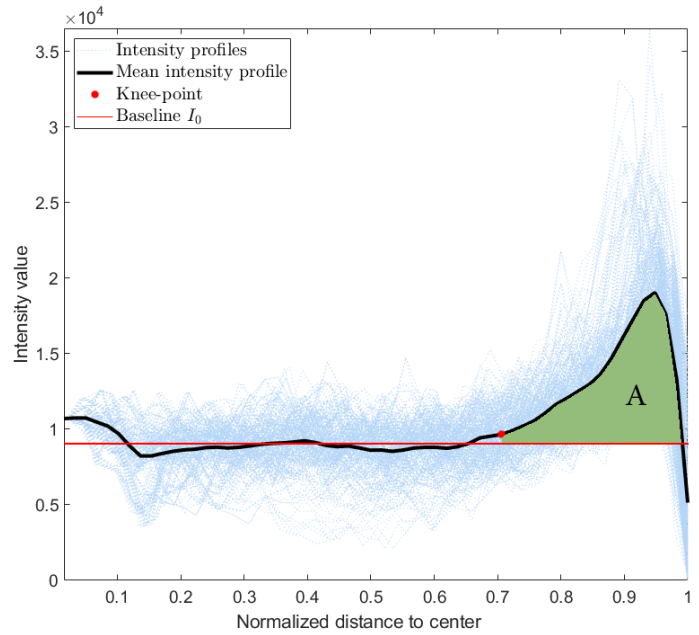

**Figure S1 : Quantification of peripheral vs bulk lamin A/C.** A. Example of a processed image of a nucleus. The red star indicates the nucleus centroid, the fitting ellipse and radial lines are depicted in red and green, respectively. B. The ratio of peripheral vs bulk lamin A/C amounts is computed from the radial fluorescence intensity profile averaged over the whole nucleus (360°). The distance to the center of the nucleus is normalized with respect to the area of the nucleus. The peak area A up until the knee-point empirically set at 0.7 (red dot) is considered to correspond to peripheral lamin A/C at the nuclear membrane while the baseline  $I_0$  is considered to correspond to bulk lamin A/C. The ratio of peripheral to bulk lamin A/C, which represents the enrichment to the nuclear membrane, is  $R = A/I_0$ .
